# Supplementary material for: Effect of anion variation on the iodine adsorption capacity of new silver(i)-dithione coordination polymers
Source: Royal Society of Chemistry journal article supplement (doi:10.1039/d5ce00275c), 2025-01-01
Supplement: d5ce00275c1.pdf [file d5ce00275c1.pdf]

## Supporting Information

### **The Effect of Anion Variation on the Iodine Adsorption Capacity of New Silver(I)-Dithion Coordination Polymers**

Maryam Bahrani-Pour<sup>a\*</sup>, Azizolla Beheshti<sup>a\*</sup>, Tahereh Sedaghat<sup>a</sup>, Sepideh Samiee<sup>a</sup>, Susan Soleymani-babadi<sup>a</sup>, Fatemeh Shakeri<sup>a</sup>, Jan Janczak<sup>b</sup>, and Emmanuele Parisi<sup>c</sup>

<sup>a</sup> *Department of Chemistry, Faculty of Science, Shahid Chamran University of Ahvaz, 6135783151 Ahvaz, Iran.*

<sup>b</sup> *Institute of Low Temperature and Structure Research, Polish Academy of Sciences, Okólna 2 str. 50-422 Wrocław, Poland.*

<sup>c</sup> *Department of Applied Science and Technology, Politecnico of Turin, Corso Duca degli Abruzzi 24, I-10129 Turin, Italy.*

\*E-mail: [a.beheshti@scu.ac.ir](mailto:a.beheshti@scu.ac.ir)

\*E-mail: [maryambahrani72@gmail.com](mailto:maryambahrani72@gmail.com)

## X-ray crystallography

The X-ray intensity data for selected single crystals **1**, **4-7** were collected on a four-circle  $\kappa$  geometry Xcalibur diffractometer with Sapphire2 area CCD detector using Mo K $\alpha$  radiation ( $\lambda = 0.71073$  Å) in Wrocław (Poland). Data collection, integration, scaling of the reflections, correction for Lorenz and polarisation effects and absorption corrections were performed using the *CrysAlisPro* Version 1.171.42.93a. The crystals **2** and **3** were measured on a Bruker D8 Venture TXS system equipped with a multilayer mirror monochromator and a Mo K $\alpha$  rotating anode X-ray tube ( $\lambda = 0.71073$  Å) in Turin (Italy). The structures were solved by the direct methods using *SHELXT*-2014/7<sup>1</sup> and refined using *SHELXL*-2018/3 program<sup>2</sup>. The hydrogen atoms were introduced in their geometrical positions and treated as rigid. Details of the crystallographic data parameters and a summary of refinement parameters are listed in Table S1. Visualisations of the structures were made with the DIAMOND 3.0 and MERCURY 3.5.1 programs.

**Table S1:** Single crystal data and structure refinements for **1-7**.

| Compound                                                                     | (1)                                                             | (2)                                                             | (3)                                                             | (4)                                                                            | (5)                                                                              | (6)                                                                             | (7)                                                                             |
|------------------------------------------------------------------------------|-----------------------------------------------------------------|-----------------------------------------------------------------|-----------------------------------------------------------------|--------------------------------------------------------------------------------|----------------------------------------------------------------------------------|---------------------------------------------------------------------------------|---------------------------------------------------------------------------------|
| Chemical formula                                                             | C <sub>17</sub> H <sub>18</sub> AgN <sub>5</sub> S <sub>3</sub> | C <sub>32</sub> H <sub>36</sub> AgN <sub>8</sub> S <sub>4</sub> | C <sub>8</sub> H <sub>9</sub> AgN <sub>3</sub> O <sub>3</sub> S | C <sub>32</sub> H <sub>36</sub> AgN <sub>9</sub> O <sub>3</sub> S <sub>4</sub> | C <sub>18</sub> H <sub>21</sub> AgClN <sub>5</sub> O <sub>4</sub> S <sub>2</sub> | C <sub>18</sub> H <sub>21</sub> AgBF <sub>4</sub> N <sub>5</sub> S <sub>2</sub> | C <sub>18</sub> H <sub>21</sub> AgF <sub>6</sub> N <sub>5</sub> PS <sub>2</sub> |
| <i>M<sub>r</sub></i> /g mol <sup>-1</sup>                                    | 496.41                                                          | 826.88                                                          | 335.11                                                          | 830.81                                                                         | 578.84                                                                           | 566.20                                                                          | 624.36                                                                          |
| crystal size/mm                                                              | 0.038×0.045×0.180                                               | 0.11×0.12× 0.15                                                 | 0.05×0.05× 0.10                                                 | 0.034× 0.038×0.232                                                             | 0.07×0.08×0.39                                                                   | 0.034×0.037×0.244                                                               | 0.021×0.024×0.356                                                               |
| Radiation, λ/ Å                                                              | 0.71073                                                         | 1.54184                                                         | 1.54184                                                         | 0.71073                                                                        | 0.71073                                                                          | 0.71073                                                                         | 0.71073                                                                         |
| <i>T</i> /K                                                                  | 295                                                             | 293                                                             | 293                                                             | 100                                                                            | 295                                                                              | 295                                                                             | 295                                                                             |
| crystal system                                                               | monoclinic                                                      | triclinic                                                       | orthorhombic                                                    | triclinic                                                                      | triclinic                                                                        | triclinic                                                                       | triclinic                                                                       |
| space group                                                                  | <i>P</i> 2 <sub>1</sub> / <i>c</i>                              | <i>P</i> -1                                                     | <i>Pbca</i>                                                     | <i>P</i> -1                                                                    | <i>P</i> -1                                                                      | <i>P</i> -1                                                                     | <i>P</i> -1                                                                     |
| <i>a</i> /Å                                                                  | 11.839(2)                                                       | 8.4341(3)                                                       | 10.4384(4)                                                      | 8.2259(4)                                                                      | 8.7317(8)                                                                        | 8.6154(4)                                                                       | 8.9221(7)                                                                       |
| <i>b</i> /Å                                                                  | 19.437(3)                                                       | 13.2016(3)                                                      | 7.9869 (4)                                                      | 12.9200(10)                                                                    | 9.0556(8)                                                                        | 9.0094(4)                                                                       | 9.1495(9)                                                                       |
| <i>c</i> /Å                                                                  | 8.4998(12)                                                      | 16.9441(6)                                                      | 25.5132(11)                                                     | 16.5893(12)                                                                    | 14.9153(13)                                                                      | 14.6660(6)                                                                      | 15.5032(19)                                                                     |
| α/°                                                                          | 90                                                              | 92.035(2)                                                       | 90                                                              | 87.868(6)                                                                      | 100.097(7)                                                                       | 100.444(4)                                                                      | 99.962(9)                                                                       |
| β/°                                                                          | 94.456(16)                                                      | 103.887(3)                                                      | 90                                                              | 81.755(5)                                                                      | 106.306(8)                                                                       | 106.561(4)                                                                      | 105.877(9)                                                                      |
| γ/°                                                                          | 90                                                              | 94.377(2)                                                       | 90                                                              | 86.775(5)                                                                      | 92.910(7)                                                                        | 92.701(4)                                                                       | 92.806(7)                                                                       |
| <i>V</i> /Å <sup>3</sup>                                                     | 1950.0(5)                                                       | 1823.31(10)                                                     | 2127.05(11)                                                     | 1741.3(2)                                                                      | 1108.14(18)                                                                      | 1067.16(8)                                                                      | 1192.7(2)                                                                       |
| <i>Z</i>                                                                     | 4                                                               | 2                                                               | 8                                                               | 2                                                                              | 2                                                                                | 2                                                                               | 2                                                                               |
| <i>F</i> (000)                                                               | 1000                                                            | 786                                                             | 1320                                                            | 852                                                                            | 584                                                                              | 568                                                                             | 624                                                                             |
| <i>D<sub>calc</sub></i> (g cm <sup>-3</sup> )                                | 1.691                                                           | 1.506                                                           | 2.093                                                           | 1.585                                                                          | 1.735                                                                            | 1.762                                                                           | 1.738                                                                           |
| μ/mm <sup>-1</sup>                                                           | 1.366                                                           | 7.415                                                           | 17.048                                                          | 0.867                                                                          | 1.254                                                                            | 1.191                                                                           | 1.150                                                                           |
| <i>T<sub>min</sub></i> / <i>T<sub>max</sub></i>                              | 0.8767 / 1.000                                                  | 0.392- 1.000                                                    | 0.4544- 1.000                                                   | 0.9024 / 1.000                                                                 | 0.8768 / 1.0000                                                                  | 0.7785 – 1.000                                                                  | 0.9576 / 1.000                                                                  |
| Total / unique / observed reflections                                        | 34705 / 4046 / 1803                                             | 25225 / 6439 / 5556                                             | 9423 / 1887 / 1459                                              | 25600 / 7546 / 4197                                                            | 32495 / 5280 / 3061                                                              | 23593 / 4939 / 2054                                                             | 18660 / 5295 / 1541                                                             |
| <i>R<sub>int</sub></i>                                                       | 0.1037                                                          | 0.0552                                                          | 0.0536                                                          | 0.0771                                                                         | 0.0437                                                                           | 0.0648                                                                          | 0.0739                                                                          |
| θ range                                                                      | 2.622 - 26.498                                                  | 2.7- 66.9                                                       | 3.465- 66.884                                                   | 2.482 - 26.992                                                                 | 2.447 – 27.995                                                                   | 2.441 – 27.249                                                                  | 2.423 - 27.500                                                                  |
| <i>a</i> , <i>b</i> (weighting scheme)                                       | 0.0212, 11.1939                                                 | 0.0531, 0.6906                                                  | 0.0434, 1.4675                                                  | 0.0002, 0.000                                                                  | 0.0413, 0.1821                                                                   | 0.0452, 0.000                                                                   | 0.0135, 0.000                                                                   |
| refls in refinement                                                          | 4046                                                            | 6439                                                            | 6439                                                            | 8402                                                                           | 5280                                                                             | 4939                                                                            | 5295                                                                            |
| Parameters                                                                   | 237                                                             | 438                                                             | 438                                                             | 446                                                                            | 311                                                                              | 283                                                                             | 297                                                                             |
| Restraints                                                                   | 0                                                               | 0                                                               | 0                                                               | 0                                                                              | 0                                                                                | 0                                                                               | 0                                                                               |
| <i>R</i> [ <i>F</i> <sup>2</sup> > 2σ( <i>F</i> <sup>2</sup> )] <sup>a</sup> | 0.0983                                                          | 0.0390                                                          | 0.0372                                                          | 0.0666                                                                         | 0.0486                                                                           | 0.0609                                                                          | 0.0888                                                                          |
| <i>wR</i> [ <i>F</i> <sup>2</sup> all refls] <sup>a</sup>                    | 0.1587                                                          | 0.1022                                                          | 0.0966                                                          | 0.0806                                                                         | 0.1101                                                                           | 0.2405                                                                          | 0.1292                                                                          |
| <i>S</i>                                                                     | 1.002                                                           | 1.03                                                            | 1.042                                                           | 0.977                                                                          | 1.034                                                                            | 1.009                                                                           | 1.005                                                                           |
| shift/error <sub>max</sub>                                                   | 0.001                                                           | 0.000                                                           | 0.000                                                           | 0.001                                                                          | 0.001                                                                            | 0.001                                                                           | 0.002                                                                           |
| Δρ <sub>max</sub> , Δρ <sub>min</sub> (eÅ <sup>-3</sup> )                    | +1.4262, -0.589                                                 | +0.81, -0.79                                                    | +0.86, -0.80                                                    | +0.727, -0.766                                                                 | +0.469, -0.298                                                                   | +0.673, -0.468                                                                  | +0.478, -0.479                                                                  |

$$^a R = \sum ||F_o| - |F_c|| / \sum F_o, wR = \{ \sum [w(F_o^2 - F_c^2)^2] / \sum wF_o^4 \}^{1/2}; w^{-1} = \sigma^2(F_o^2) + (aP)^2 + bP \text{ where } P = (F_o^2 + 2F_c^2)/3.$$

## I<sub>2</sub> adsorption experiment

The 1269 ppm I<sub>2</sub> solution in cyclohexane was prepared by dissolving a suitable mass of solid iodine in cyclohexane. For the kinetic studies, the synthesized sulfur-based complexes were activated before use at 70°C for 24 hours. Then 5 mL of this solution was added to each of the optimized weighted samples (10 mg). The amount of iodine adsorbed by each compound was determined using UV-Vis spectroscopy over time. The adsorption capacity of sulfur-based complexes and their removal efficiency were calculated using Equations 1 and 2.

$$Q_{eq} = \frac{(C_0 - C_{eq})V}{m} \quad (1)$$

$$\% \text{ Removal} = \frac{C_0 - C_{eq}}{C_0} \times 100 \quad (2)$$

In the first equation, the equilibrium adsorption capacity of the adsorbents is represented by  $Q_{eq}$ (mg/g). The mass of the used adsorbent is denoted as  $m$ (g), the volume of the iodine solution as  $V$  (liter), and the initial and equilibrium concentrations (ppm) are  $C_0$  and  $C_{eq}$ , respectively. A calibration curve of standard iodine solution at 523 nm was drawn for the calculation of the final concentrations. Four kinetics models, including the pseudo-first-order model, pseudo-second-order model, intraparticle diffusion model, and Elovich model<sup>3-5</sup> (Equations 3-6), were used to evaluate the results of iodine adsorption and describe the mechanism.

$$q_t = q_e(1 - e^{-k_1 t}) \quad (3)$$

$$q_t = \frac{q_e^2 k_2 t}{(1 + q_e k_2 t)} \quad (4)$$

$$q_t = x_i + k_i t^{1/2} \quad (5)$$

$$q_t = \frac{\ln a_e b_e}{b_e} + \frac{1}{b_e} \ln t \quad (6)$$

In the adsorption process, the interactions between the adsorbate and adsorbent are described by isotherms. To analyze the interactions between the I<sub>2</sub> solution and sulfur-based complexes, three well-known isotherm models, the Langmuir, Freundlich, and Temkin models, were applied<sup>6-8</sup> (Equation 7-9). 5 mL of iodine solution with initial concentrations ranging from 1500-2400 ppm were used for the adsorption isotherm studies.

$$q_e = \frac{q_{max} C_e k_L}{(1 + C_e k_L)} \quad (7)$$

$$q_e = k_F C_e^{1/n} \quad (8)$$

$$q_e = B \ln(A_t C_e) \quad (9)$$

### The uptake of volatile iodine

The gravimetric method, as described in the literature references, was used to determine the amount of iodine adsorbed by the **CP-1** to **CP-7** samples. The procedure was as follows: Small beakers containing 10 mg of each sample were placed in a larger vessel with a certain amount of solid I<sub>2</sub>. The sealed vessel was then placed in an oven at 65°C for 24 hours. After the system cooled to room temperature, the samples were weighed and the adsorbed iodine was calculated using equation 10. In this Equation, m<sub>1</sub> and m<sub>2</sub> represent the sample weight before and after iodine adsorption and α is the iodine adsorption capacity.

$$\alpha = (m_2 - m_1) / m_1 \times 100 \text{ wt\%} \quad (10)$$

**Table S2.** Selected bond distances (Å) and bond angles (°) for compounds **CP-1** to **CP-7**.

| Compound    | Bond distances (Å) |           | Bond angles (°) |           |
|-------------|--------------------|-----------|-----------------|-----------|
| <b>CP-1</b> | Ag-S1              | 2.551(3)  | S1-Ag-S3        | 116.1(1)  |
|             | Ag-S3              | 2.585(3)  | S1-Ag-S2        | 84.9(1)   |
|             | Ag-S2              | 2.666(3)  | S1-Ag-S2        | 124.0(1)  |
|             | Ag-S2              | 2.599(4)  | S3-Ag-S2        | 117.8(1)  |
|             | S1-C1              | 1.69(1)   | S3-Ag-S2        | 103.5(1)  |
|             | C1-N1              | 1.35(1)   | S2-Ag-S2        | 110.5(1)  |
|             |                    |           | Ag-S1-C1        | 113.5(4)  |
|             |                    |           | S1-C1-N1        | 128.5(8)  |
|             |                    |           | S1-Ag-S3        | 116.1(1)  |
|             |                    |           | S2-Ag-S2        | 110.5(1)  |
|             |                    |           | Ag-S1-C1        | 113.5(4)  |
|             |                    |           | S1-C1-N1        | 128.5(8)  |
| <b>CP-2</b> | Ag01-S3            | 2.5537(8) | S3-Ag01-S2      | 99.52(3)  |
|             | Ag01-S2            | 2.5786(9) | S3-Ag01-S1      | 110.75(3) |
|             | Ag01-S1            | 2.6035(8) | S3-Ag01-S4      | 116.43(3) |
|             | Ag01-S4            | 2.563(1)  | S2-Ag01-S1      | 106.68(3) |
|             | S1-C4              | 1.695(3)  | S2-Ag01-S4      | 106.14(3) |
|             | S1-Ag01            | 2.6035(8) | S1-Ag01-S4      | 115.44(3) |
|             |                    |           |                 |           |
| <b>CP-3</b> | Ag01-S002          | 2.518(1)  | S002-Ag01-O007  | 122.5(1)  |
|             | Ag01-O007          | 2.373(4)  | S002-Ag01-S002  | 108.29(4) |
|             | Ag01-S002          | 2.581(1)  | S002-Ag01-C00A  | 109.9(1)  |
|             | Ag01-C00A          | 2.710(5)  | O007-Ag01-S002  | 99.5(1)   |
|             | S002-C00D          | 1.718(5)  | O007-Ag01-C00A  | 107.3(2)  |
|             | S002-Ag01          | 2.581(1)  | S002-Ag01-C00A  | 108.1(1)  |
|             | N003-C00C          | 1.473(6)  | C00A-Ag01-S002  | 109.9(1)  |
|             | N003-C00D          | 1.354(5)  | C00A-Ag01-S002  | 109.9(1)  |
|             |                    |           |                 |           |
| <b>CP-4</b> | Ag-S1              | 2.559(1)  | S1-Ag-S3        | 106.16(5) |
|             | Ag-S3              | 2.579(1)  | S1-Ag-S2        | 119.74(5) |
|             | Ag-S2              | 2.565(1)  | S1-Ag-S4        | 110.05(5) |
|             | Ag-S4              | 2.604(2)  | S3-Ag-S2        | 101.71(5) |
|             | S1-C1              | 1.700(5)  | S3-Ag-S4        | 103.30(5) |
|             | S2-C15             | 1.699(5)  | S2-Ag-S4        | 113.82(5) |
|             |                    |           |                 |           |
| <b>CP-5</b> | Ag-S1              | 2.380(1)  | S1-Ag-S2        | 178.75(4) |
|             | Ag-S2              | 2.377(1)  |                 |           |
| <b>CP-6</b> | Ag1-S1             | 2.385(2)  | S1-Ag1-S2       | 178.94(5) |
|             | Ag1-S2             | 2.393(2)  |                 |           |
| <b>CP-7</b> | Ag1-S1             | 2.382(3)  | S1-Ag1-S2       | 179.8(1)  |
|             | Ag1-S2             | 2.391(3)  |                 |           |

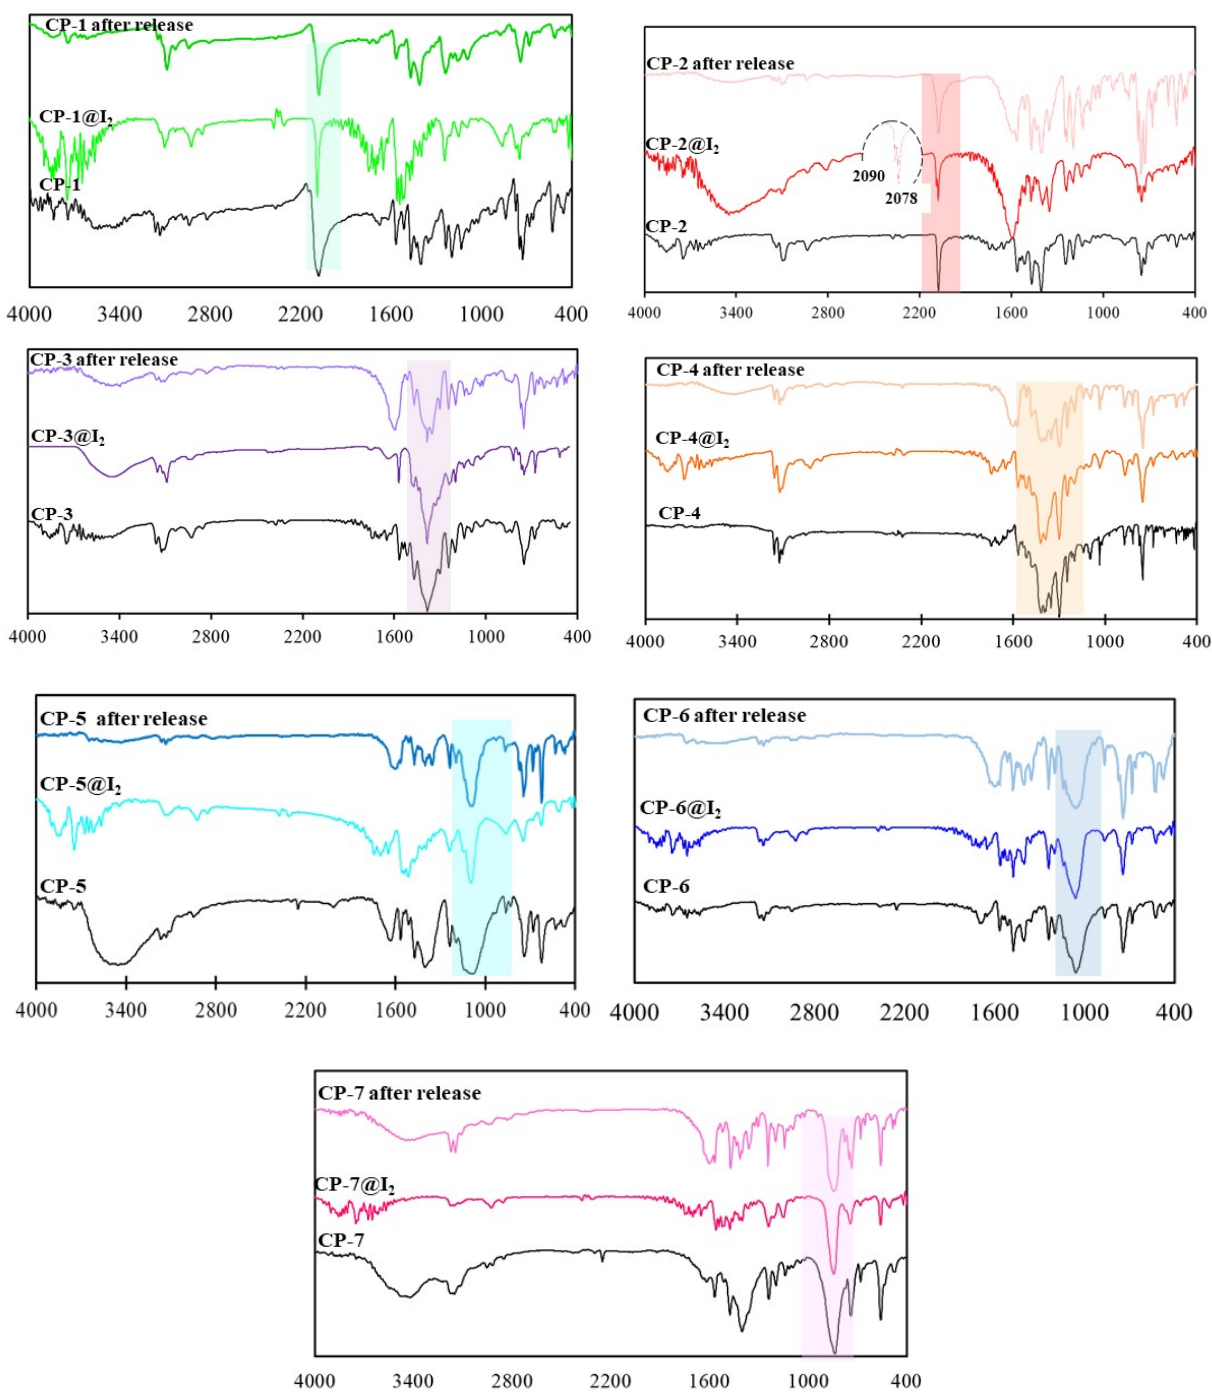

**Figure S1:** The FT-IR spectra of silver(I)-dithion coordination polymers before, after iodine adsorption, and regenerated adsorbents after release of iodine.

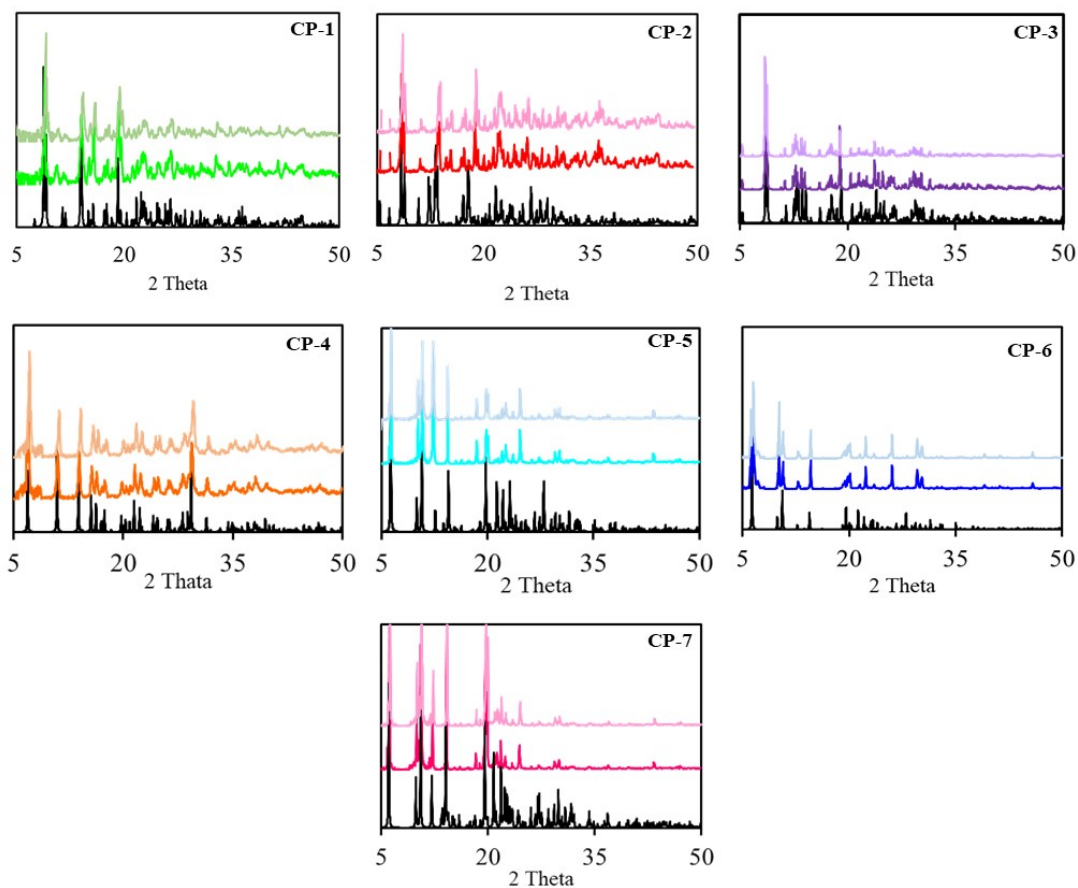

**Figure S2:** Comparison between the simulated powder X-ray diffraction patterns of the silver(I)-dithion coordination polymers (black pattern), experimental XRD patterns (bold colored pattern), and pale colored regenerated adsorbents after release of iodine patterns.



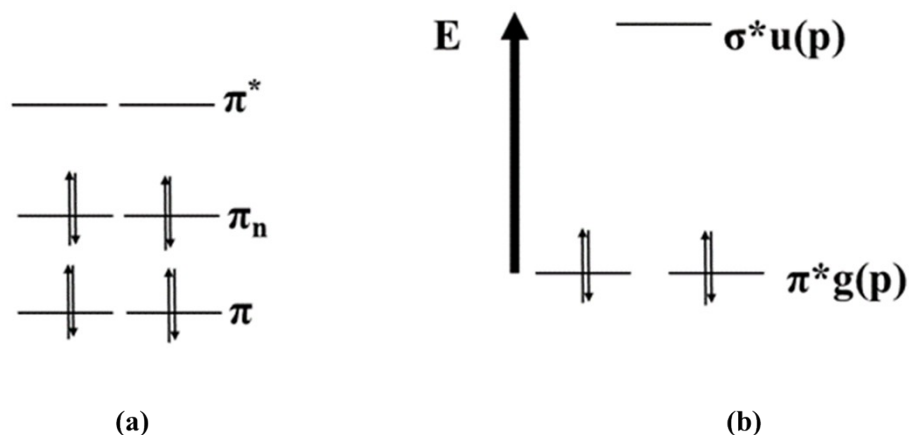

**Figure S3:** Simplified molecular orbital diagram of (a)  $\text{SCN}^-$  as a Lewis base, and (b)  $\text{I}_2$  as a Lewis acid.

#### References:

- (1) Sheldrick, G. M. SHELXT - Integrated Space-Group and Crystal-Structure Determination. *Acta Crystallogr. Sect. A Found. Crystallogr.* **2015**, 71 (1), 3–8.
- (2) Sheldrick, G. M. Crystal Structure Refinement with SHELXL. *Acta Crystallogr. Sect. C Struct. Chem.* **2015**, 71 (1), 3–8.
- (3) Ho, Y. S.; McKay, G. Pseudo-Second Order Model for Sorption Processes. *Process Biochem.* **1999**, 34 (5), 451–465.
- (4) Özacar, M.; Şengil, I. A. A Kinetic Study of Metal Complex Dye Sorption onto Pine Sawdust. *Process Biochem.* **2005**, 40 (2), 565–572.
- (5) Namasivayam, C.; Kavitha, D. Removal of Congo Red from Water by Adsorption onto Activated Carbon Prepared from Coir Pith, an Agricultural Solid Waste. *Dye. Pigment.* **2002**, 54 (1), 47–58.
- (6) Langmuir, I. The Constitution and Fundamental Properties of Solids and Liquids. Part I. Solids. *J. Am. Chem. Soc.* **1916**, 38 (11), 2221–2295.
- (7) Freundlich, H. M. F. Over the Adsorption in Solution. *Phys. chem.* **1906**, 57 (385471), 1100–1107.

- (8) Tempkin, M.I. and Pyzhev, V. J. A. P. . Kinetics of Ammonia Synthesis on Promoted Iron Catalys. *Acta Phys. Chim. USSR*. **1940**, 12 (1), 327.
